# Supplementary material
Source: PubMed Central journal article supplement (PMC5551901)
Supplement: NIHMS883449-supplement-supplement_1.pdf [file NIHMS883449-supplement-supplement_1.pdf]

## **Supplemental Material**

Statistically-Derived Subtypes in Mild Cognitive Impairment: A Latent Profile Analysis

Joel Eppig, MS; Emily C. Edmonds, PhD; Laura Campbell, BA; Mark Sanderson, BA; Lisa Delano-Wood, PhD; and Mark W. Bondi, PhD for the Alzheimer's Disease Neuroimaging Initiative\*

### **Index:**

- **Table e-1 (page 2)**
- **Table e-2 (page 2)**
- **Table e-3 (page 3)**
- **Table e-4 (page 3)**
- **Figure e-1 (page 3)**

**Table e-1:** Correlations between neuropsychological test variables in the entire ADNI corpus

|                    | Clock Drawing Test | MMSE Pentagons | Animal Fluency | Boston Naming Test | TMT, Part A | TMT, Part B | AVLT Recall | AVLT Recognition |
|--------------------|--------------------|----------------|----------------|--------------------|-------------|-------------|-------------|------------------|
| Clock Drawing Test | 1                  | -.107          | .254           | .318               | -.246       | -.345       | .226        | .220             |
| MMSE Pentagons     | -.107              | 1              | -.132          | -.147              | .199        | .206        | -.101       | -.097            |
| Animal Fluency     | .254               | -.132          | 1              | .486               | -.366       | -.412       | .427        | .309             |
| Boston Naming Test | .318               | -.147          | .486           | 1                  | -.253       | -.388       | .281        | .208             |
| TMT, Part A        | -.246              | .199           | -.366          | -.253              | 1           | .605        | -.211       | -.197            |
| TMT, Part B        | -.345              | .206           | -.412          | -.388              | .605        | 1           | -.291       | -.284            |
| AVLT Recall        | .226               | -.101          | .427           | .281               | -.211       | -.291       | 1           | .631             |
| AVLT Recognition   | .220               | -.097          | .309           | .208               | -.197       | -.284       | .631        | 1                |

Statistical significance for all neuropsychological test intercorrelations:  $p \leq 0.003$ . Pentagons:  $n = 923$ , other 7 measures:  $n = 1066$ .

*Abbreviations:* MMSE = Mini-Mental State Examination; TMT = Trail Making Test; AVLT = Rey Auditory Verbal Learning Test

**Table e-2:** Standardized Regression Based Formulas from Robust Normal Controls

| Variable                             | Adj. R <sup>2</sup> | SEE   | Constant | $\beta_{\text{Age}}$ | $\beta_{\text{Education}}$ | $\beta_{\text{Gender}}$ |
|--------------------------------------|---------------------|-------|----------|----------------------|----------------------------|-------------------------|
| MMSE Pentagons                       | 0.011               | 1.004 | 0.149    | 0.021                | -0.021                     | 0.135                   |
| Clock Drawing Test                   | 0.125               | 0.860 | 11.330   | -0.043               | 0.087                      | -0.012                  |
| $\sqrt{\text{Animal Fluency}}$       | 0.119               | 0.576 | 4.690    | -0.019               | 0.074                      | 0.093                   |
| BNT                                  | 0.072               | 2.016 | 29.084   | -0.041               | 0.153                      | -0.572                  |
| $\text{Lg}_{10}(\text{TMT, Part A})$ | 0.071               | 0.130 | 1.137    | 0.006                | -0.006                     | -0.001                  |
| $1/\sqrt{\text{TMT, Part B}}$        | 0.138               | 0.020 | 0.187    | -0.001               | 0.002                      | 0.004                   |
| AVLT Recall                          | 0.043               | 3.625 | 12.511   | -0.106               | 0.164                      | 1.089                   |
| AVLT Recognition                     | 0.004               | 2.287 | 13.676   | -0.019               | 0.029                      | 0.553                   |

*Abbreviations:* Adj. R<sup>2</sup> = Adjusted R<sup>2</sup>; SEE = standard error of the estimate; MMSE = Mini-Mental State Examination; BNT = Boston Naming Test;  $\text{Lg}_{10}$  = Logarithm 10; TMT = Trail Making Test; AVLT = Rey Auditory Verbal Learning Test

**Table e-3:** Average Latent Class Probabilities for Most Likely Latent Class Membership (Row) by Latent Class (Column)

|                          | Mixed MCI Class | Amnestic MCI Class | LPA-Derived Normal Class |
|--------------------------|-----------------|--------------------|--------------------------|
| Mixed MCI Class          | 0.878           | 0.109              | 0.013                    |
| Amnestic MCI Class       | 0.035           | 0.908              | 0.057                    |
| LPA-Derived Normal Class | 0.001           | 0.107              | 0.892                    |

*Abbreviations:* MCI = Mild Cognitive Impairment; LPA = Latent Profile Analysis

**Table e-4:** Distribution of Subsample Variables Across Latent Classes

|                          | <i>MMSE Pentagons</i> |                     | <i>CSF Biomarkers</i> |                     | <i>APOE Alleles</i> |                     | <i>Longitudinal Data</i> |                     |
|--------------------------|-----------------------|---------------------|-----------------------|---------------------|---------------------|---------------------|--------------------------|---------------------|
|                          | <i>n</i>              | Proportion of Class | <i>n</i>              | Proportion of Class | <i>n</i>            | Proportion of Class | <i>n</i>                 | Proportion of Class |
| Mixed MCI Class          | 95                    | 89.62%              | 52                    | 49.06%              | 104                 | 98.11%              | 103                      | 97.27%              |
| Amnestic MCI Class       | 374                   | 82.20%              | 237                   | 52.09%              | 450                 | 98.90%              | 429                      | 94.29%              |
| LPA-Derived Normal Class | 194                   | 79.18%              | 133                   | 54.29%              | 242                 | 98.78%              | 224                      | 91.43%              |

*Abbreviations:* MMSE = Mini-Mental State Examination; CSF = Cerebrospinal Fluid; APOE = Apolipoprotein E; MCI = Mild Cognitive Impairment; LPA = Latent Profile Analysis

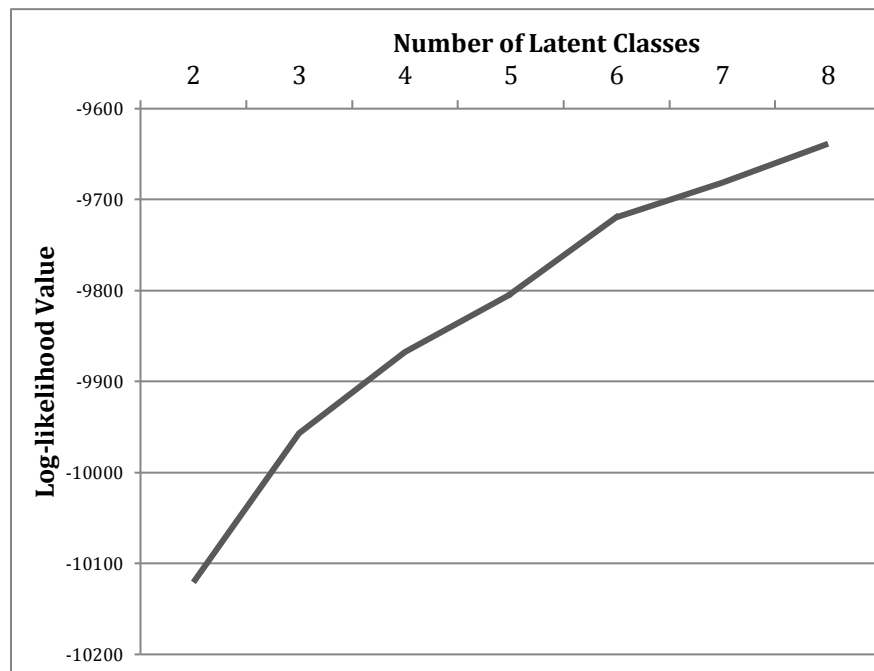

**Figure e-1:** Scree-Plot of Log-likelihood Values from each LPA solution.
